# Supplementary material for: Ion Trap LC/MS reveals the generation of reactive intermediates in acalabrutinib metabolism: phase I metabolic profiling and bioactivation pathways elucidation
Source: Royal Society of Chemistry journal article supplement (doi:10.1039/d4ra01201a), 2024-01-01
Supplement: d4ra01201a1.pdf [file d4ra01201a1.pdf]

## Reactive intermediates formation and bioactivation pathways of acalabrutinib revealed by LC-MS/MS: *in vitro* metabolic study

### Supplementary data

Aishah M. Alsibae, Mohamed W. Attwa, Ali Saber Abdelhameed, Adnan A. Kadi.

#### 1- Chromatographic condition

**Table 1:** Summary of optimized LC-ITMS parameters.

|                                                          |                                                       |        |                      |                                                                                   |
|----------------------------------------------------------|-------------------------------------------------------|--------|----------------------|-----------------------------------------------------------------------------------|
| <b>Binary mobile phase</b>                               | 0.1 % Formic acid in H <sub>2</sub> O (A) and ACN (B) |        | <b>ESI source</b>    | Positive ESI                                                                      |
|                                                          | 0.5 mL/minute                                         |        |                      | Drying gas (N <sub>2</sub> gas) at pressure (60 psi) and flow rate of 10 L/minute |
|                                                          | Elution time: 45 minutes                              |        |                      | ESI T: 350 °C                                                                     |
| <b>Agilent Zorbax eclipse plus C<sub>18</sub> Column</b> | Length                                                | 150 mm | <b>Modes</b>         | Capillary voltage: 4000 V                                                         |
|                                                          | ID                                                    | 4.6 mm |                      | Mass scan and MS <sup>2</sup>                                                     |
|                                                          | Particle size                                         | 3.5 μm | <b>Collision gas</b> | High purity N <sub>2</sub>                                                        |
|                                                          | T                                                     | 22±1°C |                      | ACB and its <i>in vitro</i> metabolites and RIs.                                  |
| <b>Gradient elution system</b>                           | Time in minutes                                       | % ACN  | <b>Mass features</b> | Fragmentor voltage (FV): 145 V<br>Amplitude: 1.25 V                               |
|                                                          | 0                                                     | 5      |                      |                                                                                   |
|                                                          | 15                                                    | 30     |                      |                                                                                   |
|                                                          | 20                                                    | 40     |                      |                                                                                   |
|                                                          | 25                                                    | 50     |                      |                                                                                   |
|                                                          | 30                                                    | 50     |                      |                                                                                   |
| 45                                                       | 5                                                     |        |                      |                                                                                   |

#### 2- Identification of M2.

M2 (*m/z* 480) is proposed to be generated by oxidation of ACB. This metabolite was predicted by StarDrop WhichP450 module. This metabolite's peak elutes at 19.1 minute in fragment ion chromatogram. Dissociation of M2 ion at inside the collision cell generates six fragment ions at *m/z* 462, *m/z* 444, *m/z* 414, *m/z* 395, *m/z* 385 and *m/z* 367 (Figure S1). Predicted toxicities of M2 by DEREK Nexus module showed that oxidation did not change the toxicity alert for skin sensitization.

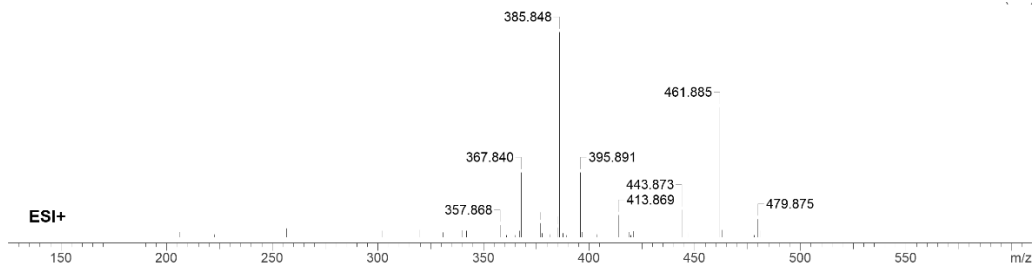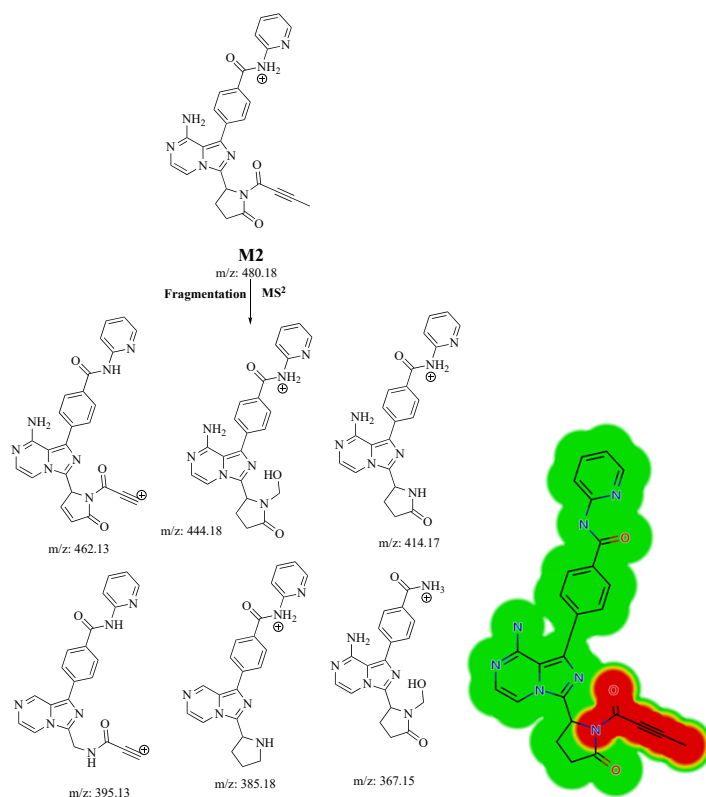

**Figure S1.** Product ion mass spectrum of M2, the proposed interpretation of fragmentation of M2 and the predicted toxicities by StarDrop DEREK Nexus module.

### 3- Identification of M3.

M3 (*m/z* 400) is proposed to be generated by N-dealkylation of ACB. This metabolite's peak elutes at 18.46 minute in fragment ion chromatogram. Dissociation of M3 ion inside the collision cell generates five fragment ions at *m/z* 386, *m/z* 383, *m/z* 331, *m/z* 306 and *m/z* 237 (Figure S2). DEREK module predicted that n-dealkylation of ACB remove the alert of skin sensitization but add the risk of HERG channel inhibition (plausible).

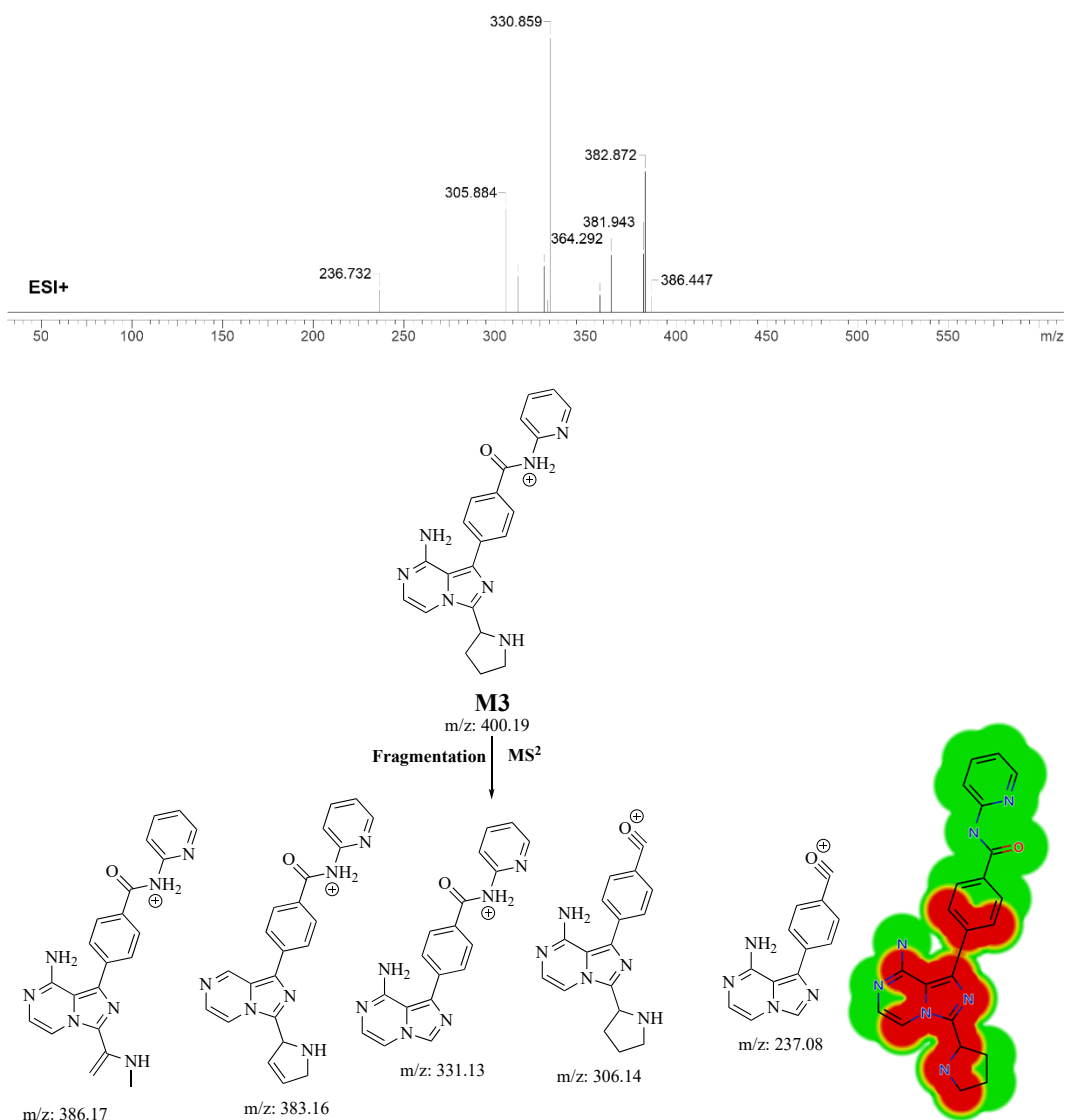

**Figure S2.** Product ion mass spectrum of M3 and the proposed interpretation of fragmentation of M3.

#### 4- Identification of M4.

M4 ( $m/z$  416) is proposed to be generated by hydroxylation and n-dealkylation of ACB. This metabolite's peak elutes at 23.05 minute in fragment ion chromatogram. Dissociation of M4 ion inside the collision cell generates four fragment ions at  $m/z$  398,  $m/z$  370,  $m/z$  331 and  $m/z$  322 (Figure S3).

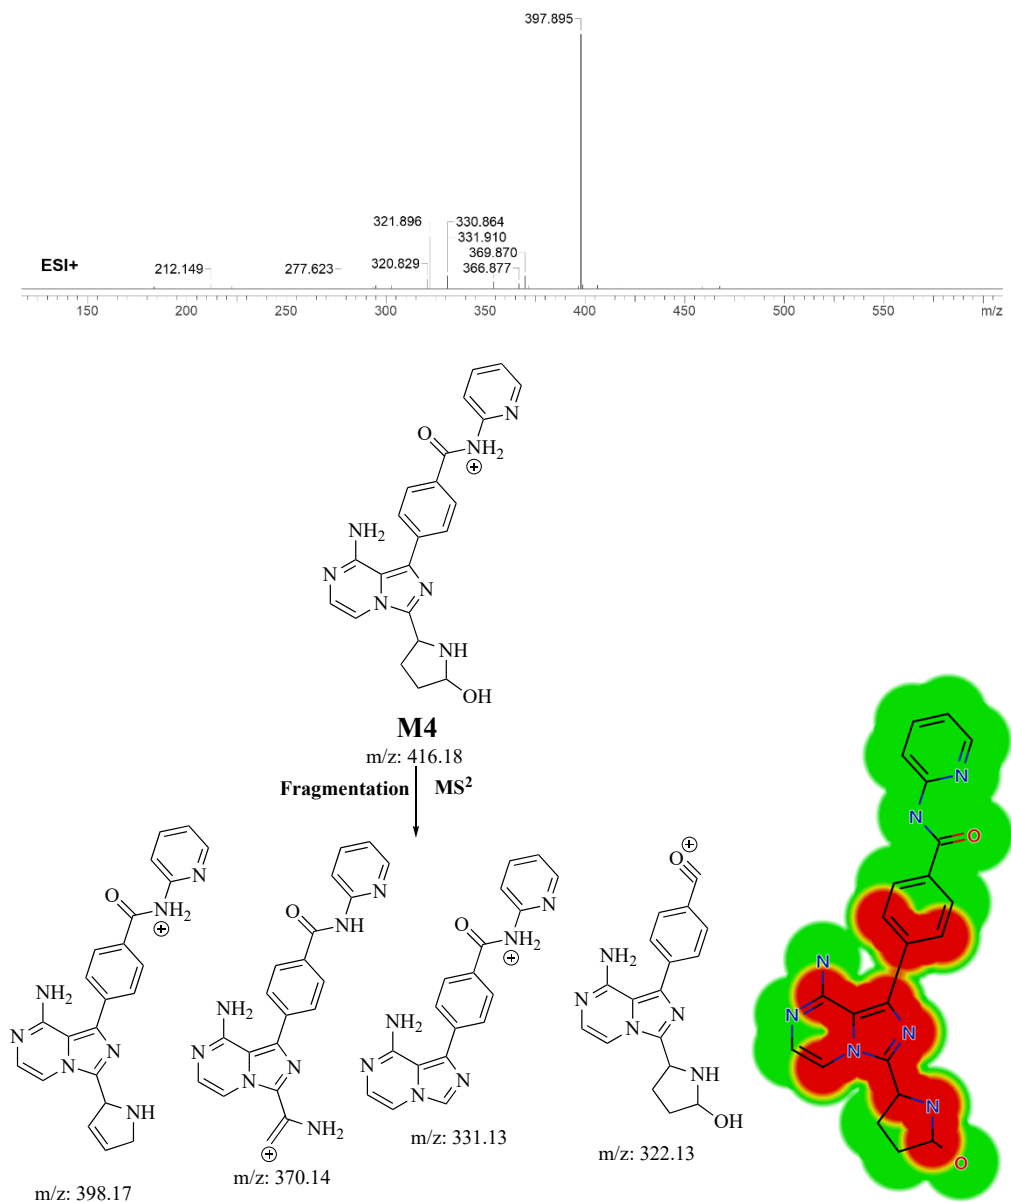

**Figure S3.** Product ion mass spectrum of M4, the proposed interpretation of fragmentation of M4.

### 5- Identification of M5.

M5 (m/z 444) is proposed to be generated by of ACB. This metabolite's peak elutes at 19.79 minute in fragment ion chromatogram. Dissociation of M5 ion inside the collision cell generates five fragment ions at m/z 426, m/z 406 m/z 331, m/z 382 and m/z 369 (Figure S4).

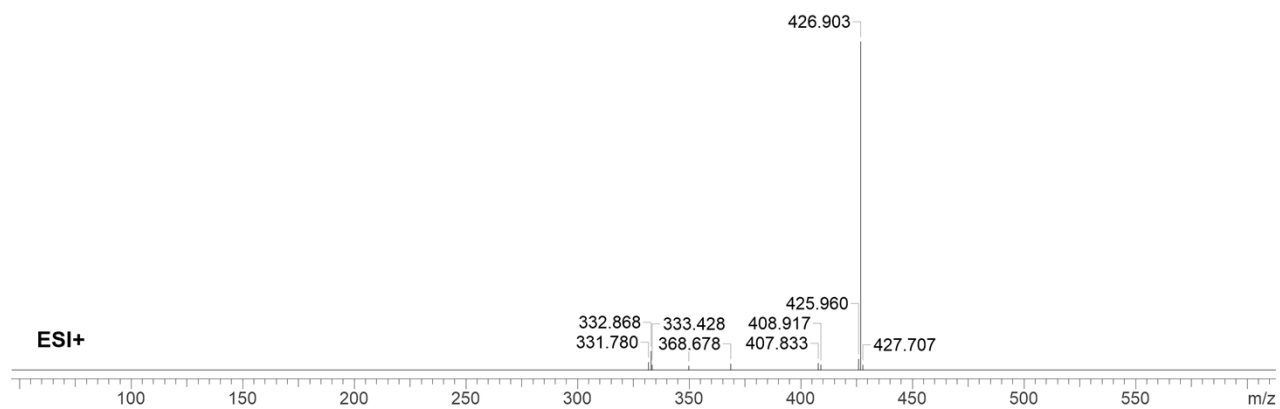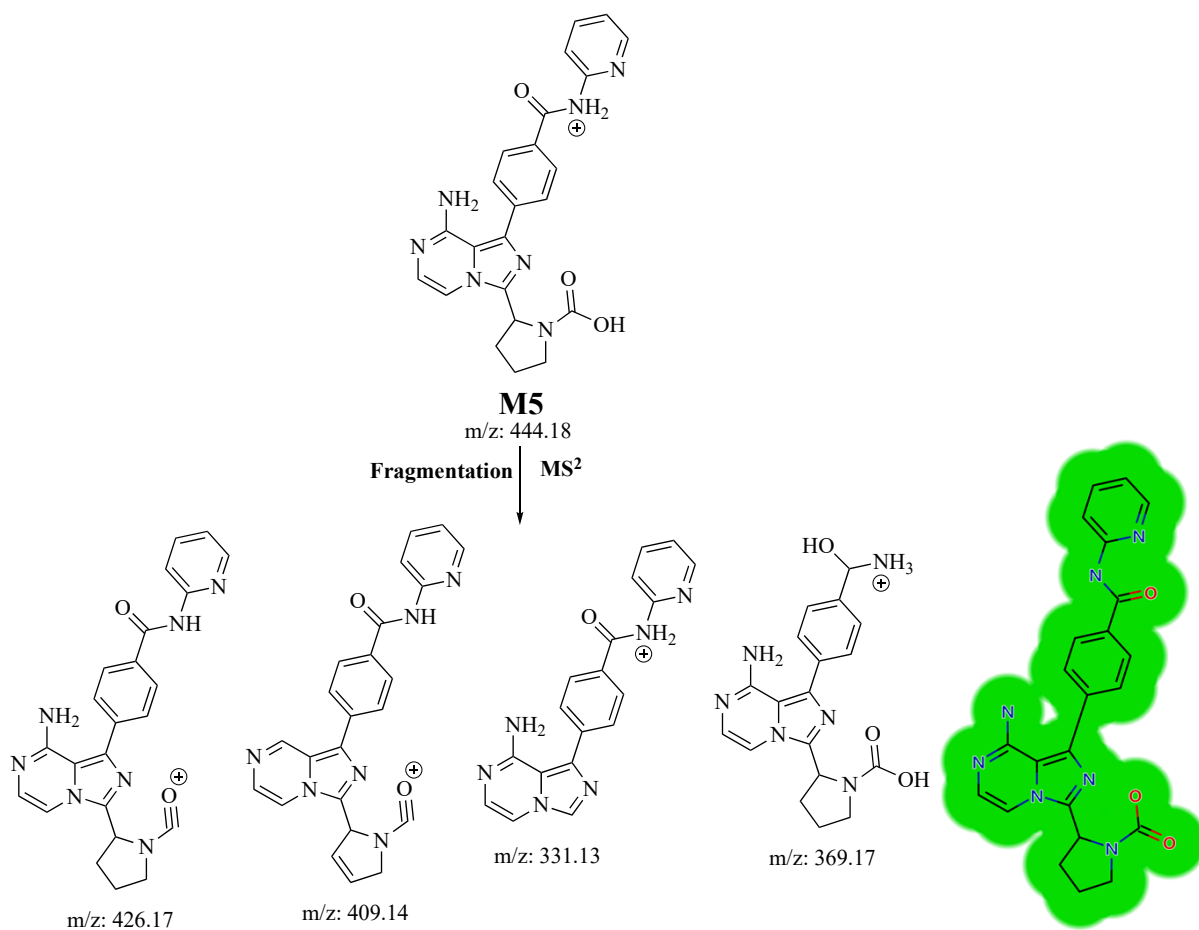

**Figure S4.** Product ion mass spectrum of M5 and the proposed interpretation of fragmentation of M5.
